# Supplementary material for: IL (Interleukin)-6 Contributes to Deep Vein Thrombosis and Is Negatively Regulated by miR-338-5p
Source: PubMed Central journal article supplement — Arterioscler Thromb Vasc Biol. 2019 Dec 19;40(2):323–34. doi: 10.1161/ATVBAHA.119.313137 (PMC6975520; doi:10.1161/atvbaha.119.313137), 2019-12-19
Supplement: atv-40-323-s002.pdf [file atv-40-323-s002.pdf]

## SUPPLEMENTAL MATERIALS

### **IL-6 contributes to deep vein thrombosis and is negatively regulated by miR-338-5p**

Yunhong Zhang, MD<sup>1,2</sup>, Zhen Zhang, PhD<sup>2</sup>, Ran Wei, PhD<sup>2</sup>, Xiuming Miao, MD<sup>3</sup>, Shangwen Sun, MD<sup>2,4</sup>, Gang Liang, MD<sup>3</sup>, Chu Chu, MD<sup>1,2</sup>, Lin Zhao, MD<sup>2</sup>, Xiaoxiao Zhu, MD<sup>2</sup>, Qiang Guo, PhD<sup>2</sup>, Bin Wang, MD, PhD<sup>3\*</sup>, Xia Li, MD, PhD<sup>2\*</sup>

<sup>1</sup> School of Medicine and Life Sciences, University of Jinan-Shandong Academy of Medical Sciences, 18877 Jingshi Road, Jinan 250062, Shandong, China.

<sup>2</sup> Laboratory for Molecular Immunology, Institute of Basic Medicine, Shandong First Medical University & Shandong Academy of Medical Sciences, 18877 Jingshi Road, Jinan 250062, Shandong, China.

<sup>3</sup> Department of Peripheral Vascular Disease, Affiliated Hospital of Shandong University of Traditional Chinese Medicine, Bianque Building, 16369 Jingshi Road, Jinan 250014, Shandong, China.

<sup>4</sup> The Key Laboratory of Cardiovascular Remodeling and Function Research, Chinese Ministry of Education, Chinese National Health Commission and Chinese Academy of Medical Sciences, The State and Shandong Province Joint Key Laboratory of Translational Cardiovascular Medicine, Department of Cardiology, Qilu Hospital of Shandong University, Jinan, 250012, China.

## Major Resources Tables

### Animals (in vivo studies)

| Species       | Vendor or Source | Background Strain | Sex  |
|---------------|------------------|-------------------|------|
| C57BL/6J Mice | Ribobio          | C57BL/6J          | male |
| C57BL/6J Mice | R&D system       | C57BL/6J          | male |

### Animal breeding

|                 | Species       | Vendor or Source          | Background Strain | Other Information |
|-----------------|---------------|---------------------------|-------------------|-------------------|
| Parent - Male   | C57BL/6J Mice | SPF Biotechnology Company | C57BL/6J          | None              |
| Parent - Female | C57BL/6J Mice | SPF Biotechnology Company | C57BL/6J          | None              |

### Antibodies

| Target antigen                                                 | Vendor or Source | Catalog #  | Working concentration | Lot # (preferred but not required) |
|----------------------------------------------------------------|------------------|------------|-----------------------|------------------------------------|
| Rabbit Polyclonal IL-6 antibody                                | Proteintech      | 21865-1-AP | 3.5 ug/ml             | 00071431                           |
| Mouse Anti-Rabbit IgG (H+L) Secondary Antibody, FITC Conjugate | BOSTER           | BM2012     | 20 ug/ml              | BST12F05A12                        |
| Mouse IL-6 Antibody                                            | R&D system       | MAB406     | 5ug/g                 | AHV2319021                         |
| Rat IgG1 Isotype Control                                       | R&D system       | MAB005     | 5ug/g                 | CAN1019031                         |

### Cultured Cells

| Name                                            | Vendor or Source                                                           | Sex (F, M, or unknown) |
|-------------------------------------------------|----------------------------------------------------------------------------|------------------------|
| 293T cells                                      | Procell Life Science & Technology Co., Ltd                                 | unknown                |
| HeLa cells                                      | Procell Life Science & Technology Co., Ltd                                 | unknown                |
| Human umbilical vein endothelial cells (HUVECs) | Procell Life Science & Technology Co., Ltd                                 | unknown                |
| Peripheral blood mononuclear cells (PBMCs)      | Affiliated Hospital of Shandong University of Traditional Chinese Medicine | unknown                |

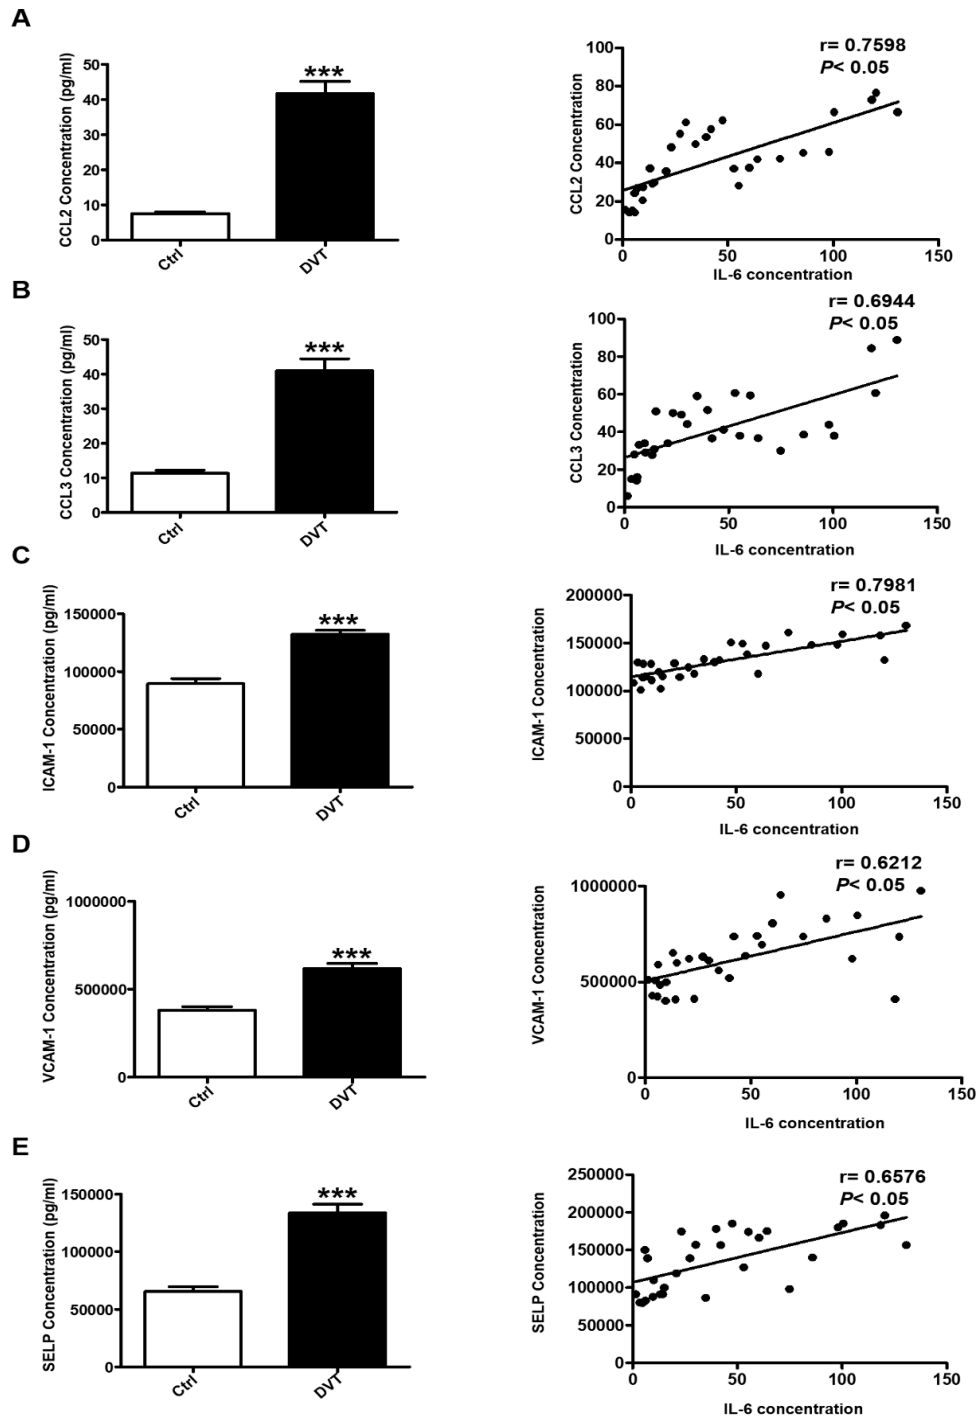

**Supplemental Figure I. IL-6 is positively correlated to markers of vascular endothelial function in DVT.**

(A-E) The expression levels of CCL2, CCL3, ICAM-1, VCAM-1, and SELP protein in the plasma from 30 DVT patients and 30 controls were determined by ELISA. The correlation between CCL2, CCL3, ICAM-1, VCAM-1, SELP, and IL-6 was analyzed using Pearson correlation analysis (n= 30). \*\*\* $P < 0.001$ .

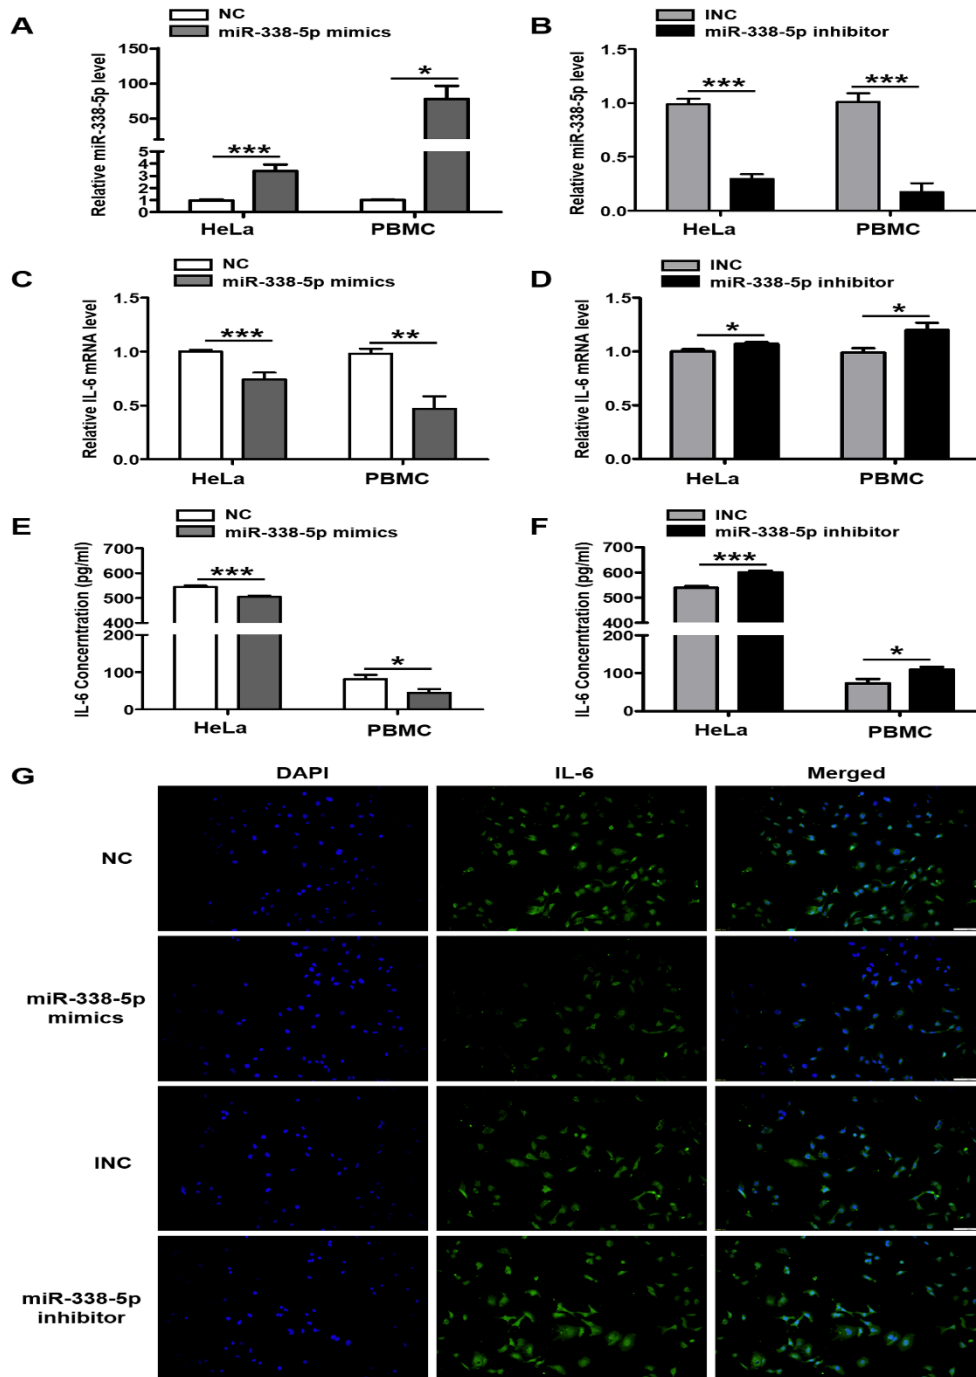

**Supplemental Figure II. miR-338-5p negatively regulates IL-6 expression.**

(A-B) The expression of miR-338-5p was detected by qRT-PCR in HeLa cells and PBMCs. (C-D) The expression level of *IL-6* mRNA after negative control (NC), miR-338-5p mimics, inhibitor negative control (INC), and miR-338-5p inhibitor transfection as detected by qRT-PCR in HeLa cells and PBMCs. (E-F) Expression of IL-6 protein was examined by ELISA in HeLa cells and PBMCs. (G) Expression of IL-6 in HUVECs were detected after transfection with NC, miR-338-5p mimics, INC, and miR-338-5p inhibitor by immunofluorescence staining (magnification,  $\times 200$ ). Scale bar= 100  $\mu\text{m}$ . \* $P < 0.05$ , \*\* $P < 0.01$ , \*\*\* $P < 0.001$ .

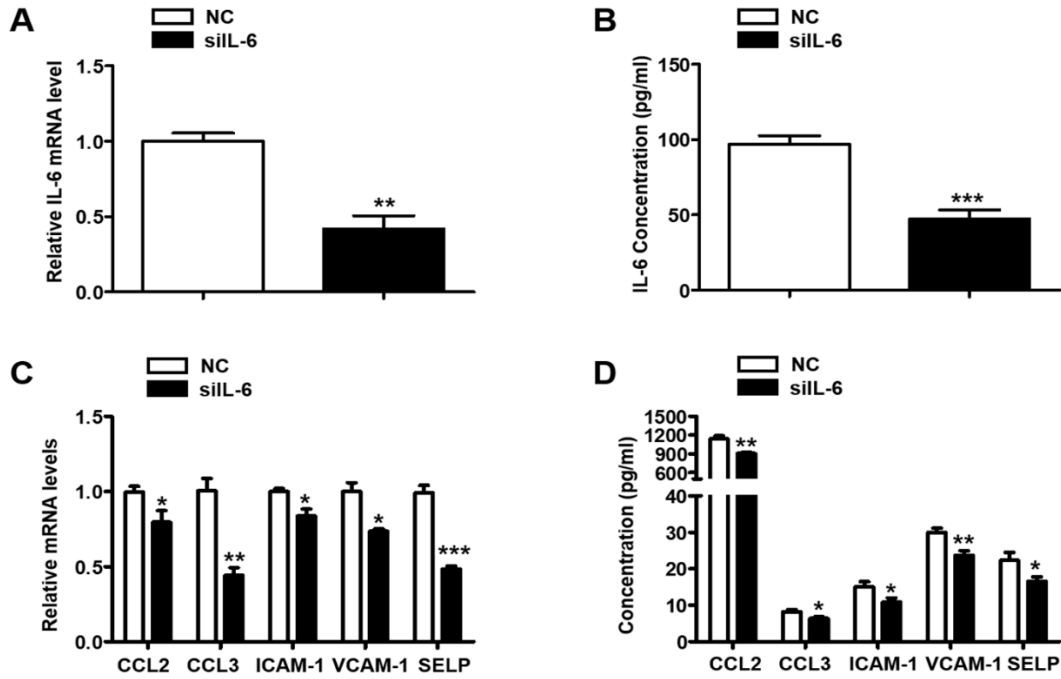

**Supplemental Figure III. IL-6 knockdown decreases mRNA and protein levels of the markers for vascular endothelial function *in vitro*.**

(A-B) The expression levels of IL-6 mRNA and protein were modulated by siRNA in HUVECs. (C-D) The levels of CCL2, CCL3, ICAM-1, VCAM-1 and SELP mRNA and protein were reduced when IL-6 was knocked down by siRNA in HUVECs. \* $P < 0.05$ , \*\* $P < 0.01$ , \*\*\* $P < 0.001$ .

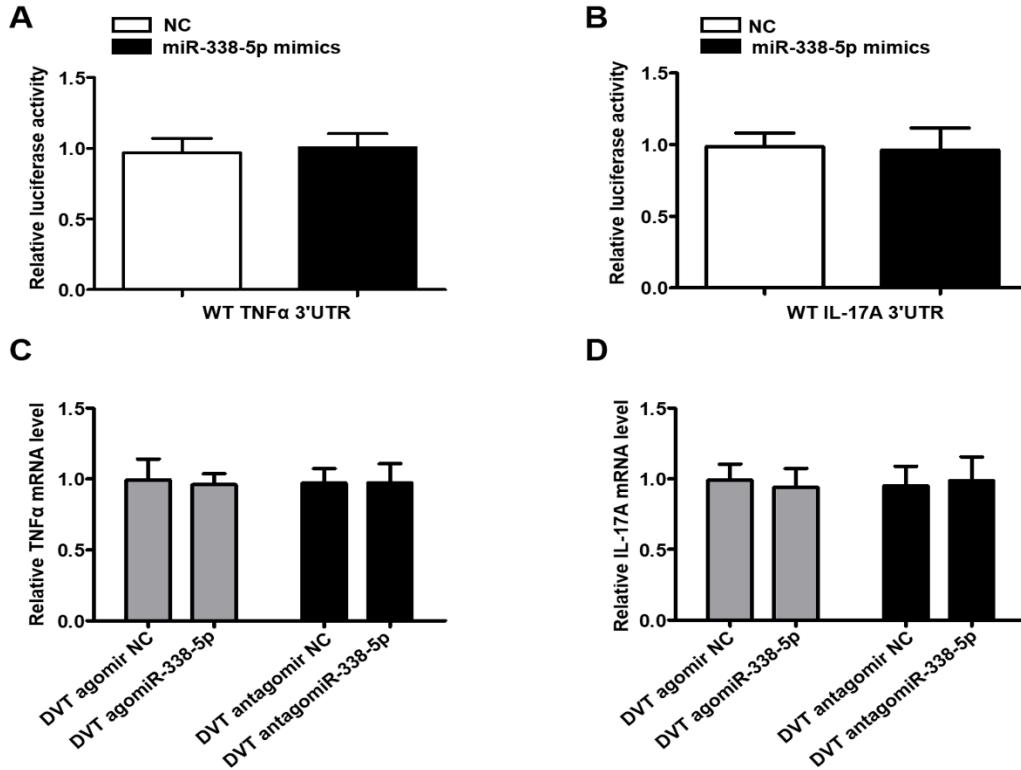

**Supplemental Figure IV. miR-338-5p does not target *TNF $\alpha$*  or *IL-17A*.**

(A-B) The luciferase activity was determined by co-transfecting the vectors (*TNF $\alpha$*  or *IL-17A* 3'-UTR-WT) combined with NC or miR-338-5p mimics into 293T cells. (C) *TNF $\alpha$*  mRNA expression was determined by qRT-PCR in PBMCs of DVT mice treated with agomiR-338-5p (n= 7) or antagomiR-338-5p (n= 12). (D) *IL-17A* mRNA expression was determined by qRT-PCR in PBMCs of DVT mice treated with agomiR-338-5p (n= 7) or antagomiR-338-5p (n= 12).

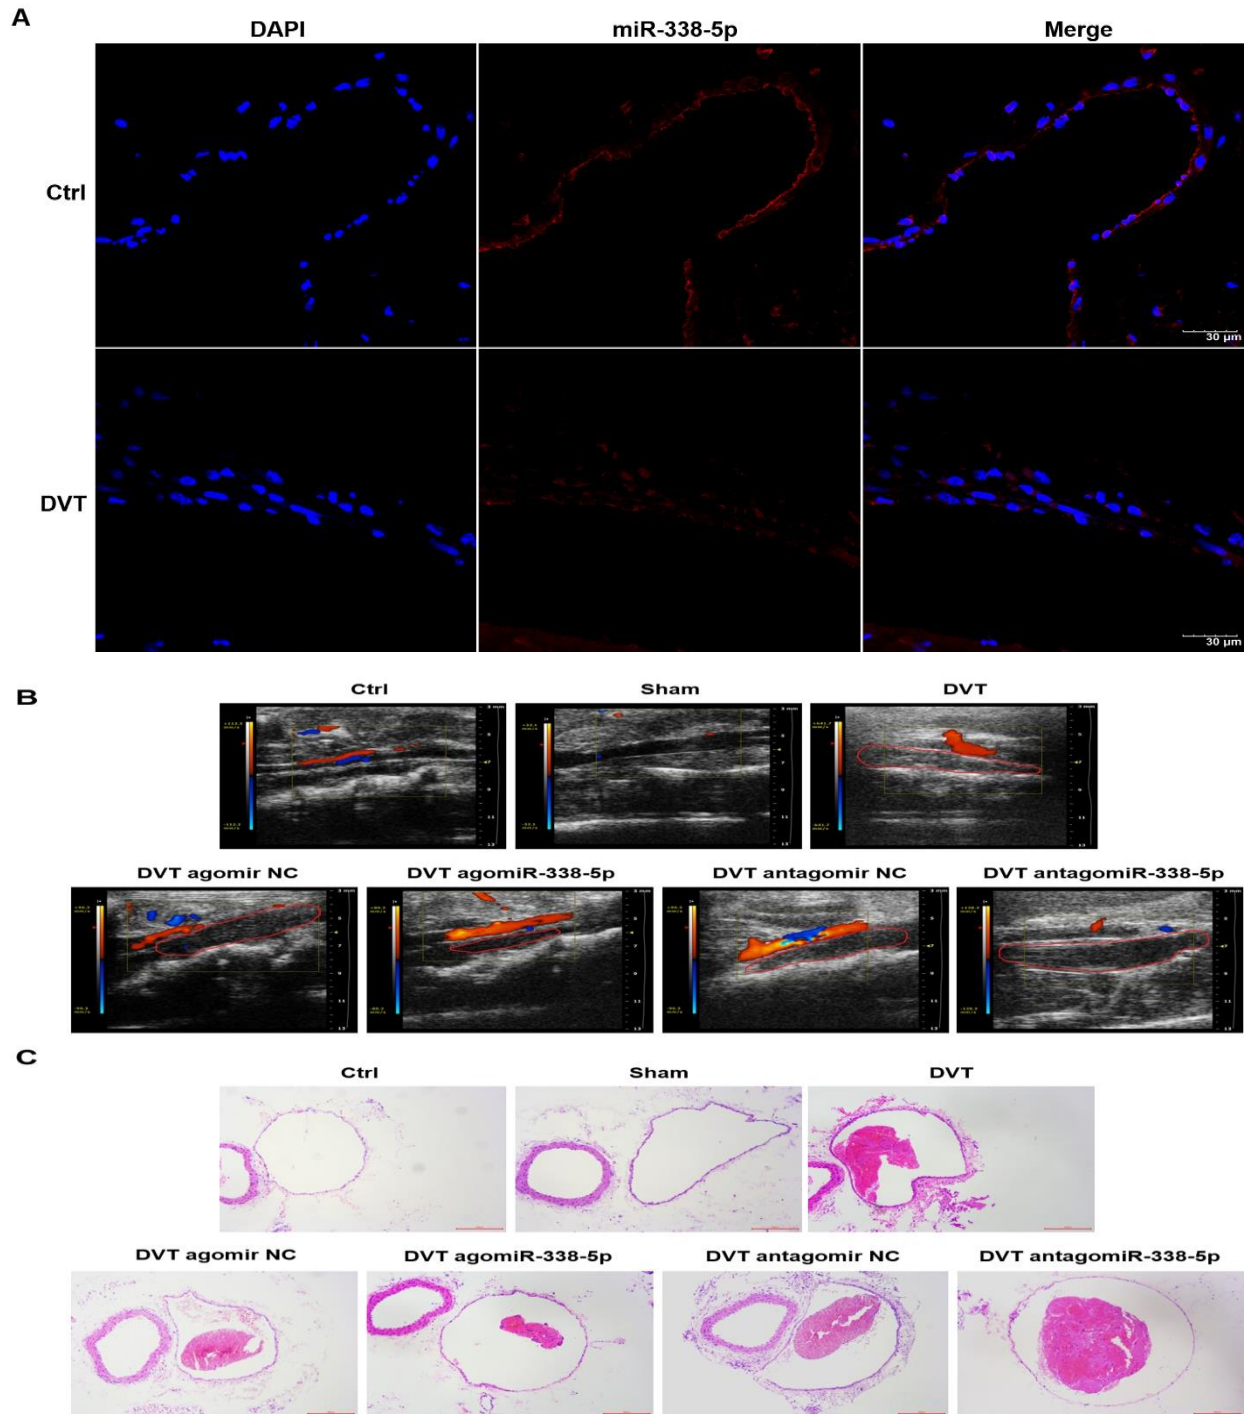

**Supplemental Figure V. The role of miR-338-5p in DVT.**

(A) Confocal microscopy for miR-338-5p expression in vascular tissues (miR-338-5p, red; DAPI, blue; magnification,  $\times 600$ ). Scale bars= 30  $\mu\text{m}$ . (B) Representative images of thrombi in each treatment group detected by vascular ultrasound at 48 h post-operation. (C) H&E staining of serial cross sections of inferior vena cava (IVC) from control, sham, DVT mice, and DVT mice treated with agomir NC, agomiR-338-5p, antagomir NC, or antagomiR-338-5p at 48 hours (magnification,  $\times 100$ ). Scale bars= 200  $\mu\text{m}$ .

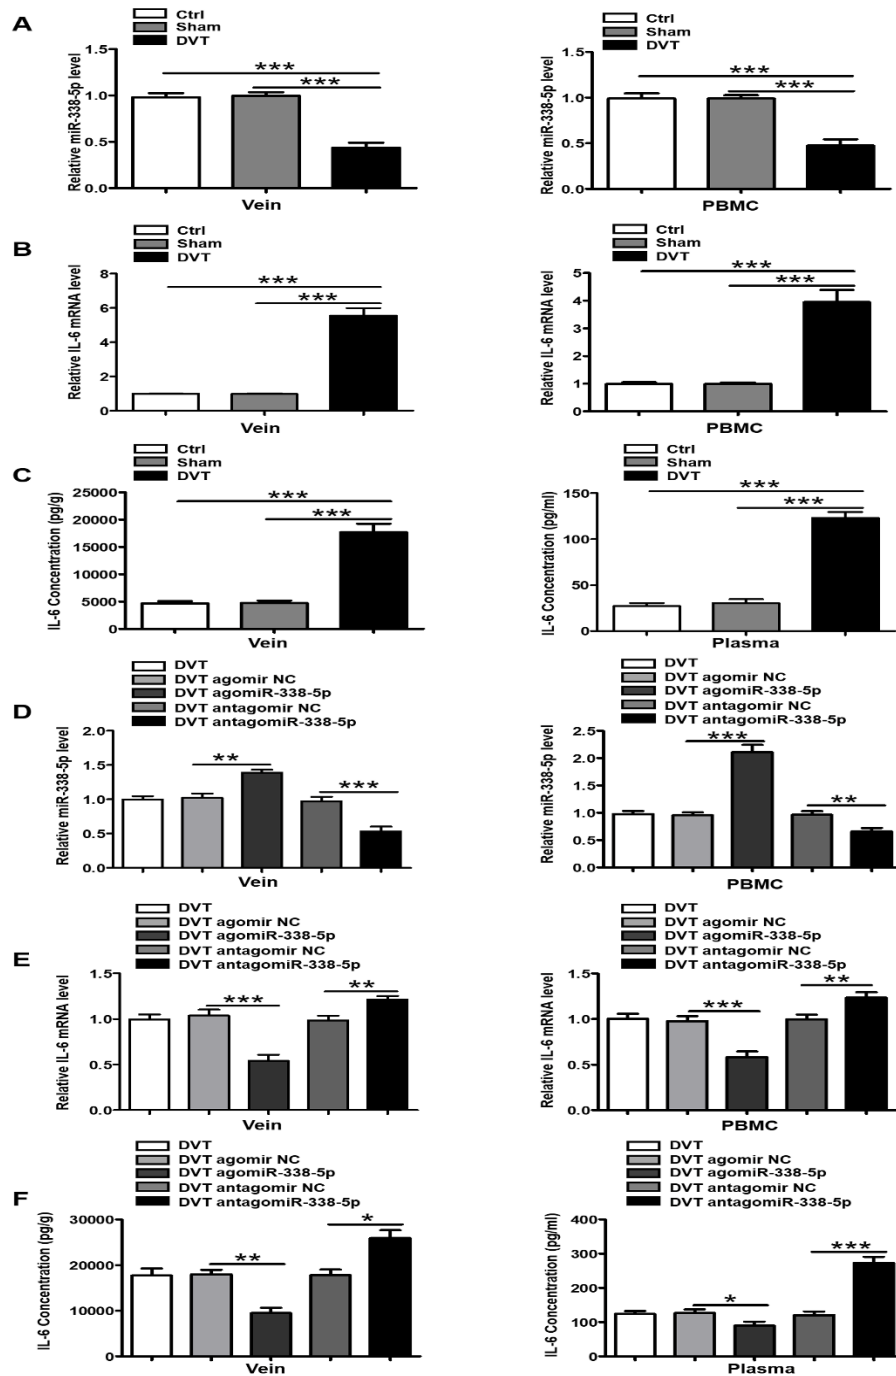

**Supplemental Figure VI. The regulatory effect of miR-338-5p overexpression on IL-6 *in vivo*.**

(A-B) The expression levels of miR-338-5p and *IL-6* mRNA were detected by qRT-PCR in vascular tissue and PBMCs of control, sham, and DVT animal group (n= 10-15/group). (C) IL-6 protein levels were determined by ELISA in vascular tissue and plasma of control, sham, and DVT animal group (n= 10-15/group). (D-E) The expression levels of miR-338-5p and *IL-6* mRNA were detected by qRT-PCR in vascular tissue and PBMCs of each treatment group (n= 7-12/group). (F) IL-6 protein levels were determined by ELISA in vascular tissue and plasma of each treatment group (n= 7-12/group). \* $P < 0.05$ , \*\* $P < 0.01$ , \*\*\* $P < 0.001$ .



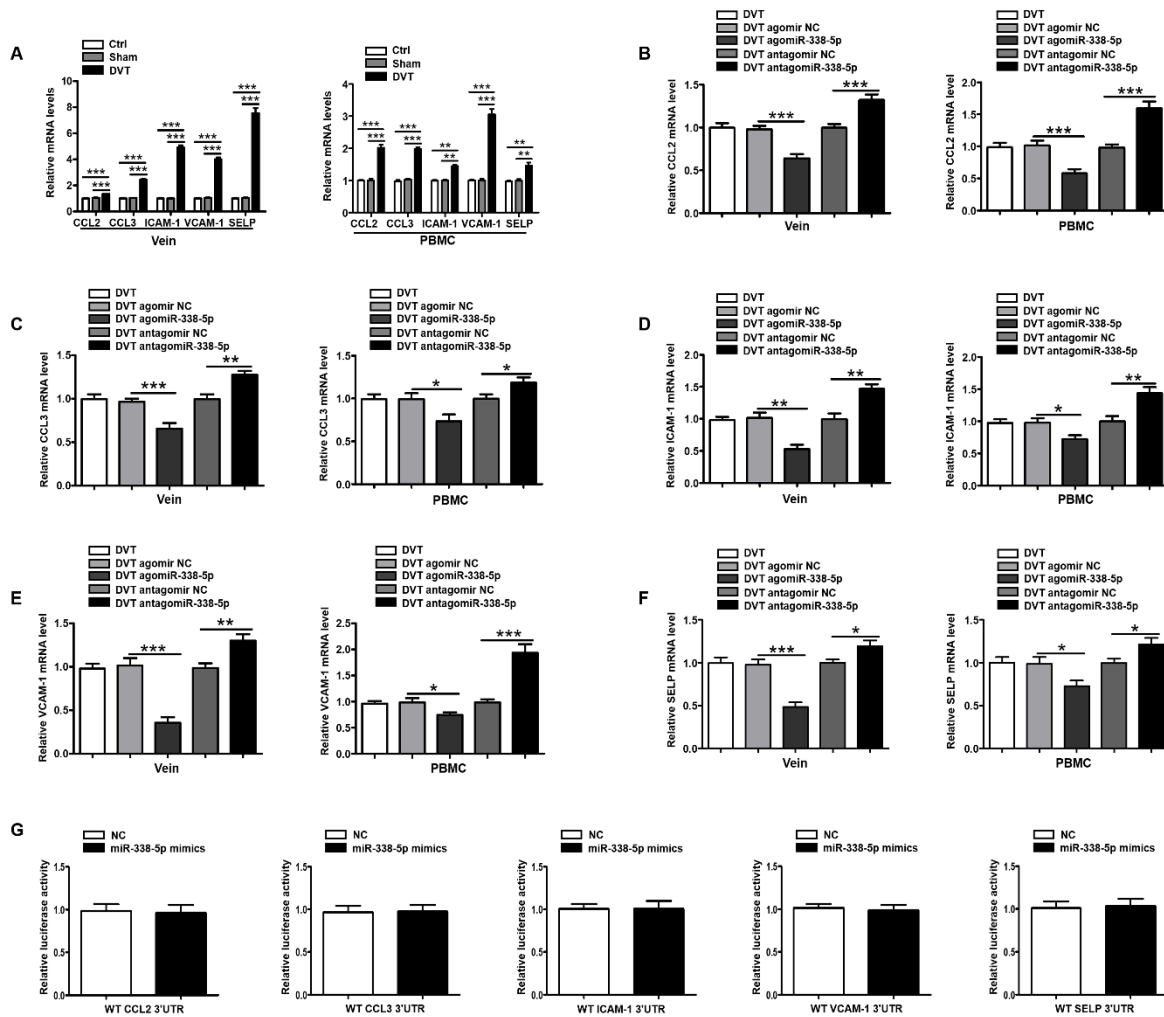

**Supplemental Figure VII. The regulatory effect of miR-338-5p overexpression on vascular markers of endothelial function *in vivo*.**

(A) Expression of *CCL2*, *CCL3*, *ICAM-1*, *VCAM-1*, and *SELP* was detected by qRT-PCR in vascular tissue and PBMCs of control, sham, DVT animal group (n= 10-15/group). (B-F) *CCL2*, *CCL3*, *ICAM-1*, *VCAM-1*, and *SELP* mRNA levels were determined by qRT-PCR in vascular tissue and PBMCs of DVT animal group and each treatment group (n= 7-12/group). (G) The luciferase activity was determined by co-transfecting the vectors (*CCL2*, *CCL3*, *ICAM-1*, *VCAM-1*, or *SELP* 3'-UTR-WT) combined with NC or miR-338-5p mimics into 293T cells. \* $P < 0.05$ , \*\* $P < 0.01$ , \*\*\* $P < 0.001$ .

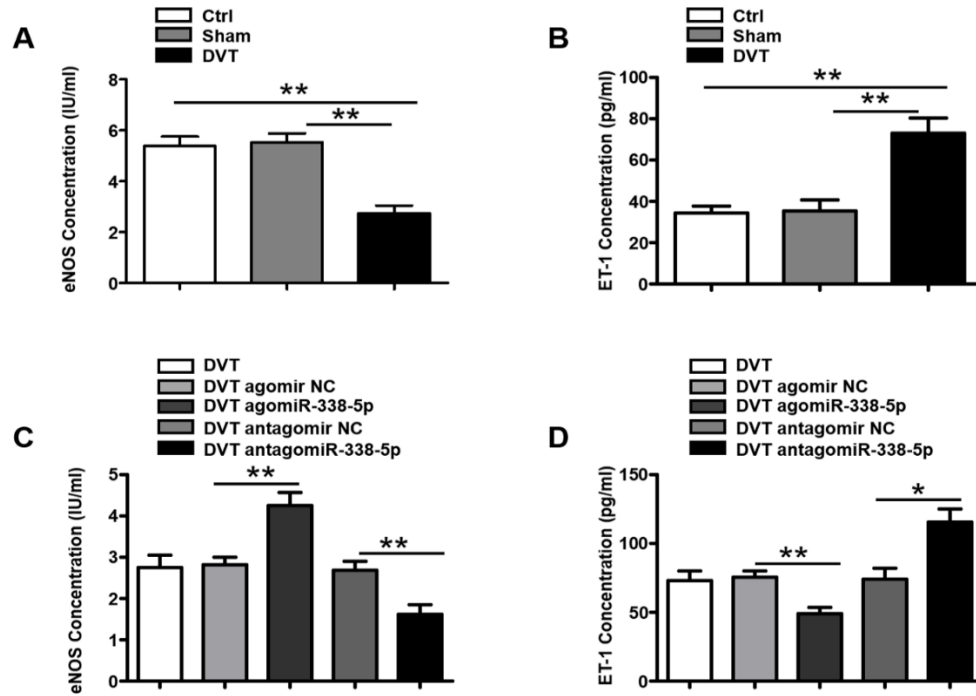

**Supplemental Figure VIII. The regulatory effects of miR-338-5p on the expression of eNOS and ET-1.**

(A-B) Expression of eNOS and ET-1 was detected by ELISA in plasma of control, sham, and DVT animal group (n= 10-15/group). (C-D) eNOS and ET-1 protein levels were determined by ELISA in plasma of DVT animal group and each treatment group (n= 7-12/group). \* $P < 0.05$ , \*\* $P < 0.01$ .

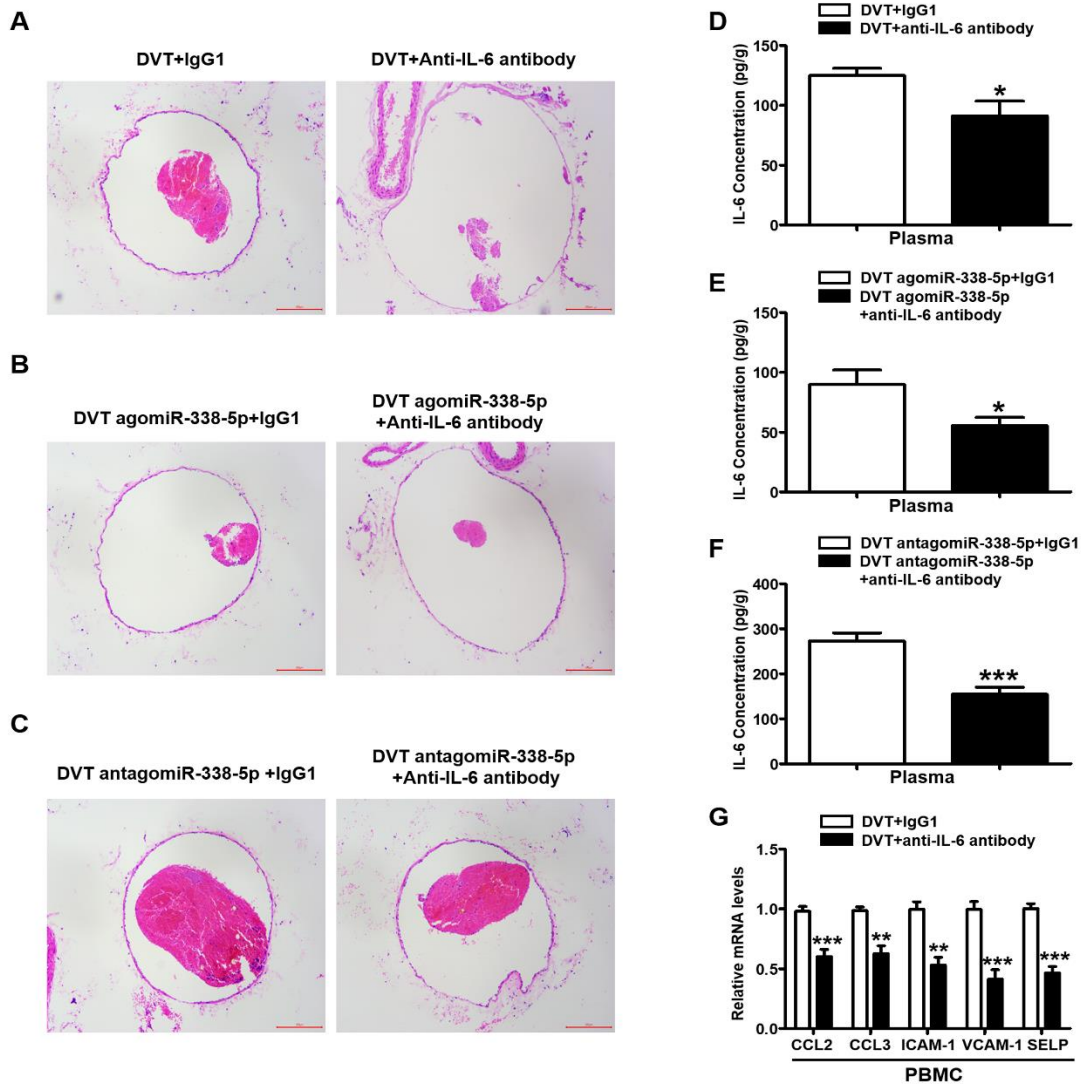

**Supplemental Figure IX. The role of IL-6 in DVT formation and vascular endothelial function.**

(A-C) H&E staining of serial cross sections of IVC from DVT mice treated with IgG1, anti-IL-6 antibody, agomiR-338-5p+IgG1, agomiR-338-5p+anti-IL-6 antibody, antagomiR-338-5p+IgG1, or antagomiR-338-5p+anti-IL-6 antibody at 48 hours (magnification,  $\times 100$ ). Scale bars= 200  $\mu\text{m}$ . (D-F) IL-6 protein levels were determined by ELISA in plasma of DVT animal group and each treatment group (n= 5-12/group). (G) *CCL2*, *CCL3*, *ICAM-1*, *VCAM-1*, and *SELP* mRNA levels were detected by qRT-PCR in PBMCs of DVT mice treated with IgG1 (n= 10) or anti-IL-6 antibody (n= 8). \* $P < 0.05$ , \*\* $P < 0.01$ , \*\*\* $P < 0.001$ .

**Supplemental Table I. List of polymerase chain reaction (PCR) primer sequences used in miRNA expression analysis.**

| <b>Gene</b> | <b>Sequence (5'-3')</b>                                              |
|-------------|----------------------------------------------------------------------|
| U6          | Forward: CAGCACATATACTAAAATTGGAACG<br>Reverse: ACGAATTTGCGTGTCATCC   |
| miR-338-5p  | Forward: CGTTACGCAACAATATCCTGGT<br>Reverse: TATGGTTCTTCACGACTCCTTCAC |

**Supplemental Table II. List of PCR primer sequences used in mRNA expression analysis.**

| Gene           | Species | Sequence (5'-3')                                                  |
|----------------|---------|-------------------------------------------------------------------|
| GAPDH          | Human   | Forward: ACAACTTTGGTATCGTGGAAGG<br>Reverse: GCCATCACGCCACAGTTTC   |
| IL-6           | Human   | Forward: CACACAGACAGCCACTCACC<br>Reverse: CACCAGGCAAGTCTCCTCAT    |
| CCL2           | Human   | Forward: TGCAATCAATGCCCCAGTCA<br>Reverse: GGGTCAGCACAGATCTCCTT    |
| CCL3           | Human   | Forward: GCTCTCTGCAACCAGTTCTCT<br>Reverse: GGCTTCGCTTGGTTAGGAAGA  |
| ICAM-1         | Human   | Forward: AGGATGGCACTTTCCCCTG<br>Reverse: GGAGAGCACATTCACGGTCA     |
| VCAM-1         | Human   | Forward: CCACAGTAAGGCAGGCTGTAA<br>Reverse: GCTGGAACAGGTCATGGTCA   |
| SELP           | Human   | Forward: CACCAACGAGGCTGAGAACT<br>Reverse: GGCTGACGGACTCTTGATGT    |
| $\beta$ -actin | Mice    | Forward: TCCTTCTTGGGTATGGAATCCTG<br>Reverse: TGCTAGGAGCCAGAGCAGTA |
| IL-6           | Mice    | Forward: GGATACCACTCCCAACAGACC<br>Reverse: TTCTGCAAGTGCATCATCGT   |
| CCL2           | Mice    | Forward: AGTTAACGCCCCACTCACCT<br>Reverse: TGCTGGTGATCCTCTTGTAGC   |
| CCL3           | Mice    | Forward: GCTTCTCCTACAGCCGGAAG<br>Reverse: AGGTCTCTTTGGAGTCAGCG    |
| ICAM-1         | Mice    | Forward: CTGGGCTTGGAGACTCAGTG<br>Reverse: CCACACTCTCCGGAACGAA     |
| VCAM-1         | Mice    | Forward: CTGGGAAGCTGGAACGAAGT<br>Reverse: GCCAAACACTTGACCGTGAC    |
| SELP           | Mice    | Forward: GGGCTTCAGGACAATGGACA<br>Reverse: TGGAAGGTGCAGGTTGATCC    |
| TNF $\alpha$   | Mice    | Forward: AGCCGATGGGTTGTACCTTG<br>Reverse: ATAGCAAATCGGCTGACGGT    |
| IL-17A         | Mice    | Forward: CACCGCAATGAAGACCCTGA<br>Reverse: TTCCCTCCGCATTGACACAG    |

**Supplemental Table III. Oligo sequences used in the experiments.**

| <b>Oligo ID</b>            | <b>Sequence (5'-3')</b>                                             |
|----------------------------|---------------------------------------------------------------------|
| mimic negative control     | sense: UUCUCCGAACGUGUCACGUTT<br>antisense: ACGUGACACGUUCGGAGAATT    |
| hsa-miR-338-5p mimics      | sense: AACAAUAUCCUGGUGCUGAGUG<br>antisense: CUCAGCACCAGGAUUAUUGUUUU |
| inhibitor negative control | CAGUACUUUUGUGUAGUACAA                                               |
| hsa-miR-338-5p inhibitor   | CACUCAGCACCAGGAUUAUUGUU                                             |
| IL-6-siRNA                 | sense: GGAGACAUGUAACAAGAGUTT<br>antisense: ACUCUUGUUACAUGUCUCCTT    |
| agomir NC                  | sense: UUCUCCGAACGUGUCACGUTT<br>antisense: ACGUGACACGUUCGGAGAATT    |
| agomiR-338-5p              | sense: AACAAUAUCCUGGUGCUGAGUG<br>antisense: CUCAGCACCAGGAUUAUUGUUUU |
| antagomir NC               | CAGUACUUUUGUGUAGUACAA                                               |
| antagomiR-338-5p           | CACUCAGCACCAGGAUUAUUGUU                                             |

**Supplemental Table IV. Thrombus formation in different groups of DVT mice.**

| <b>Group</b>                            | <b>Number of mice</b> | <b>Mice number of thrombus formation</b> | <b>Thrombus formation rate (%)</b> |
|-----------------------------------------|-----------------------|------------------------------------------|------------------------------------|
| DVT                                     | 15                    | 10                                       | 67                                 |
| DVT agomir NC                           | 15                    | 10                                       | 67                                 |
| DVT agomiR-338-5p                       | 15                    | 7                                        | 47                                 |
| DVT antagomir NC                        | 15                    | 10                                       | 67                                 |
| DVT antagomiR-338-5p                    | 15                    | 12                                       | 80                                 |
| DVT+IgG1                                | 15                    | 10                                       | 67                                 |
| DVT+anti-IL-6 antibody                  | 15                    | 8                                        | 53                                 |
| DVT agomiR-338-5p+IgG1                  | 15                    | 7                                        | 47                                 |
| DVT agomiR-338-5p+anti-IL-6 antibody    | 15                    | 5                                        | 33                                 |
| DVT antagomiR-338-5p+IgG1               | 15                    | 12                                       | 80                                 |
| DVT antagomiR-338-5p+anti-IL-6 antibody | 15                    | 9                                        | 60                                 |

**Supplemental Table V. Data for 30 down-regulated miRNAs filtered in the Chip.**

| systematic name  | C1       | C2       | C3       | C4       | C5       | C6       | D1       | D2       | D3       | D4       | D5       | D6       | active_sequence    | chr   | Control type | mirbase accession No |
|------------------|----------|----------|----------|----------|----------|----------|----------|----------|----------|----------|----------|----------|--------------------|-------|--------------|----------------------|
| hsa-miR-1305     | 2.890522 | 2.644196 | 2.866945 | 2.967403 | 2.727855 | 2.840017 | -3.32163 | -2.05754 | -1.31385 | -3.28559 | -3.29659 | -3.25973 | TCTCTCCATTAGAGTTGA |       | 0            | MIMAT0005893         |
| hsa-miR-6717-5p  | 3.102884 | 2.69068  | 3.036068 | 3.036068 | 2.856456 | 2.749102 | -3.32163 | -3.32188 | 1.09525  | -3.28559 | -3.29659 | -3.25973 | TCTCTACATCCCCACATC |       | 0            | MIMAT0025846         |
| hsa-miR-4442     | 2.519717 | 2.308948 | 2.491924 | 2.232139 | 2.270366 | 2.408409 | -3.32163 | -3.32188 | -1.30551 | -3.28559 | -3.29659 | -3.25973 | CCTCCCTCTGTCCG     |       | 0            | MIMAT0018960         |
| hsa-miR-4653-3p  | 2.557016 | 2.396131 | 2.347332 | 2.361599 | 2.016503 | 2.379267 | -3.32163 | -3.32188 | -1.23594 | -3.28559 | -3.29659 | -3.25973 | TCTCCAAGCAACCCTT   |       | 0            | MIMAT0019719         |
| hsa-miR-4419a    | 2.715025 | 2.169307 | 2.133044 | 2.176626 | 2.032571 | 2.151727 | -3.32163 | -3.32188 | 0.128117 | -3.28559 | -3.29659 | -3.25973 | TGCAGTCTCCTCCCT    |       | 0            | MIMAT0018931         |
| hsa-miR-564      | 3.283139 | 2.460638 | 2.532001 | 2.396131 | 2.491924 | 2.58784  | -3.32163 | 0.948874 | -1.72766 | -3.28559 | -3.29659 | -3.25973 | GCCTGCTGACACCGT    |       | 0            | MIMAT0003228         |
| hsa-miR-483-5p   | 3.317903 | 2.250299 | 2.232139 | 1.747687 | 2.151727 | 2.075307 | -3.32163 | -1.25142 | 1.859515 | -3.28559 | -3.29659 | -3.25973 | CTCCCTCTTTCTCT     |       | 0            | MIMAT0004761         |
| hsa-miR-4788     | 2.331065 | 2.049457 | 2.106463 | 2.106463 | 1.798728 | 2.123388 | -1.67023 | -0.63613 | 0.205429 | -3.28559 | -3.29659 | -3.25973 | GCCTCCCTTAGCTGG    |       | 0            | MIMAT0019958         |
| hsa-miR-5684     | 1.261394 | 1.025808 | 1.820038 | 1.16116  | 1.453198 | 1.478231 | -3.32163 | -3.32188 | -2.0638  | -3.28559 | -3.29659 | -3.25973 | CTGTTGCTCAGGCTAG   |       | 0            | MIMAT0022473         |
| hsa-miR-650      | 2.032571 | 1.380212 | 2.075307 | 1.392273 | 0.005068 | 1.722659 | -2.0638  | -2.11512 | -1.68486 | -3.28559 | -0.6177  | -3.25973 | GTCCTGAGAGCGCTGC   |       | 0            | MIMAT0003320         |
| hsa-miR-6891-5p  | 2.615863 | 1.131285 | 1.058549 | 1.193515 | 1.261998 | 1.641266 | -3.32163 | 0.834653 | -0.2856  | -3.28559 | -3.29659 | -3.25973 | CCCCTCATCCCC       |       | 0            | MIMAT0027682         |
| hsa-miR-4713-3p  | 3.658131 | 3.219048 | 3.235708 | 3.544785 | 2.989471 | 3.16269  | 1.418389 | 1.620391 | 1.958252 | -3.28559 | 0.197783 | -3.25973 | TTCTCCACTGTCTGG    |       | 0            | MIMAT0019821         |
| hsa-miR-6769b-5p | 2.097667 | 3.315963 | 0.192071 | 2.169307 | 1.058549 | 3.289554 | -3.32163 | -3.31385 | -3.32138 | -3.28559 | -3.29659 | -3.25973 | GCACCTCTCCTCCCC    |       | 0            | MIMAT0027620         |
| hsa-miR-6740-5p  | 4.015547 | 3.437881 | 3.584511 | 3.707074 | 3.544785 | 3.637127 | 1.747687 | 2.123388 | 2.232139 | 1.213376 | 2.097667 | -3.25973 | TCTCTCTCTCCATCCC   |       | 0            | MIMAT0027381         |
| hsa-miR-6126     | 2.450542 | 2.532001 | 2.331065 | 2.379267 | 2.185673 | 2.48021  | 0.928946 | -1.22525 | 1.732256 | -3.28559 | 0.140876 | 1.317771 | TCTCCGCGGGC        |       | 0            | MIMAT0024599         |
| hsa-miR-513c-5p  | 0.834653 | 0.948874 | 0.250975 | 0.197783 | -0.65314 | 1.115497 | 0.005068 | -2.21119 | -2.14442 | -3.28559 | -0.66784 | -3.25973 | ATAAACGACACCTCCTGA | chrX  | 0            | MIMAT0005789         |
| hsa-miR-6850-5p  | 2.049457 | 0.205429 | 1.747687 | -1.24639 | 3.296593 | 3.289554 | -3.32163 | -3.32188 | -3.34287 | -3.28559 | -3.29659 | -3.25973 | CGCCCGGCCA         |       | 0            | MIMAT0027600         |
| hsa-miR-338-5p   | 0.861888 | 0.140876 | 0.993548 | 0.176005 | 0.050273 | 0.050273 | -2.1352  | -2.14138 | -1.71401 | -3.28559 | -3.29659 | 0.897482 | CACTCAGCACCAGGA    |       | 0            | MIMAT0004701         |
| hsa-miR-4449     | 1.180867 | 1.115497 | 0.168898 | 1.144027 | 1.180867 | 0.250975 | -0.66917 | -0.29264 | 0.140876 | -3.28559 | -0.2856  | -3.25973 | TGCGTCGCGCAGC      |       | 0            | MIMAT0018968         |
| hsa-miR-6724-5p  | 2.218914 | 2.232139 | 1.392273 | 1.765325 | 1.581486 | 1.131285 | 0.240207 | 1.006592 | 0.948874 | 0.215132 | 0.993548 | -3.25973 | CCCCACGCCCT        |       | 0            | MIMAT0025856         |
| hsa-miR-6879-5p  | 3.915201 | 3.658131 | 3.812723 | 3.742235 | 3.707074 | 3.780678 | 2.29194  | 2.519717 | 2.749102 | 2.460638 | 2.58784  | 2.424246 | CTCTCCACCTTCCC     |       | 0            | MIMAT0027658         |
| hsa-miR-6780b-5p | 3.683952 | 3.283139 | 3.482658 | 3.437881 | 3.437881 | 3.437881 | 2.097667 | 2.460638 | 2.491924 | 2.097667 | 2.408409 | 1.732256 | TCTTCCCTGCCAAGC    |       | 0            | MIMAT0027572         |
| hsa-miR-874-3p   | 2.199508 | 2.840017 | 2.69068  | 2.727855 | 2.644196 | 2.715025 | 0.948874 | 2.106463 | 1.180867 | 1.418389 | 1.581486 | 1.115497 | TCGGTCCCTCGGG      | chr5  | 0            | MIMAT0004911         |
| hsa-miR-6820-5p  | 5.146708 | 5.105475 | 5.017525 | 4.920903 | 4.920903 | 5.35999  | 3.848797 | 3.402584 | 4.132329 | 3.780678 | 3.707074 | 4.159892 | TGACCCAGCTCTGC     |       | 0            | MIMAT0027540         |
| hsa-miR-150-5p   | 10.77513 | 10.77513 | 10.77513 | 10.77513 | 9.949985 | 10.52436 | 9.41637  | 9.949985 | 8.878604 | 9.41637  | 9.949985 | 8.670342 | CACTGGTACAAGGGTTGG | chr19 | 0            | MIMAT0000451         |
| hsa-miR-6127     | 5.439865 | 4.756314 | 4.920903 | 4.860059 | 4.860059 | 4.827461 | 3.525265 | 3.729768 | 3.986414 | 3.848797 | 4.100742 | 3.848797 | CCTCCACCCACTC      |       | 0            | MIMAT0024610         |
| hsa-miR-6875-5p  | 5.105475 | 4.423265 | 4.756314 | 4.535265 | 4.470753 | 4.617086 | 3.463085 | 3.584511 | 3.615922 | 3.463085 | 3.683952 | 3.565681 | TCTCCTGTCTGGGT     |       | 0            | MIMAT0027650         |
| hsa-miR-1233-5p  | 5.273259 | 4.860059 | 4.893096 | 4.72706  | 4.689545 | 4.920903 | 3.729768 | 3.463085 | 4.06103  | 3.729768 | 3.812723 | 4.036973 | TGCCGTGCCCTGG      | chr15 | 0            | MIMAT0022943         |
| hsa-miR-342-5p   | 3.812723 | 3.637127 | 3.742235 | 4.100742 | 3.634786 | 3.05275  | 2.331065 | 3.336585 | 1.703047 | 2.396131 | 2.989471 | 1.782291 | TCAATCACAGATAGACCC |       | 0            | MIMAT0004694         |
| hsa-miR-324-3p   | 6.365108 | 6.310584 | 6.456261 | 6.66172  | 6.409631 | 6.365108 | 5.146708 | 5.273259 | 5.56788  | 5.146708 | 5.638115 | 5.439865 | CCAGCAGACCTGGGG    | chr17 | 0            | MIMAT0000762         |
